# Supplementary material for: Human umbilical cord-derived mesenchymal stem cells promote repair of neonatal brain injury caused by hypoxia/ischemia in rats
Source: PubMed Central journal article supplement — Neural Regen Res. 2022 Apr 1;17(11):2518–25. doi: 10.4103/1673-5374.339002 (PMC9120712; doi:10.4103/1673-5374.339002), 2022-04-01
Supplement: NRR-17-2518_Suppl1.pdf [file NRR-17-2518_Suppl1.pdf]

## 脐带供者知情同意书样稿

此版本知情同意书已经按照伦理委员会建议进行修改,与建库时的版本不同,现在已经启用此新版本。

## 捐献脐带的知情同意书

尊敬的\_\_\_\_\_女士/先生:

您将被邀请参与脐带的相赠。用于临床医疗、教学及科学研究。本知情同意书提供给您一些信息以帮助您决定是否参与其中。

您参加本项研究是自愿的。

本次研究已通过大连医科大学附属第一医院伦理审查委员会审查。

这份知情同意书介绍了本次研究的意义、内容、以及取材的必要性。对研究的益处以及取材过程可能造成的危险性。同时也包括其他一些在您同意参与本研究之前应该关注的信息。我们鼓励您在任何时间提出关于本次研究的任何问题。

### 捐赠的基础

细胞治疗技术是近年来发展起来的医疗技术,在该技术治疗中由于可以在脐带华通胶中获得间充质干细胞,脐带间充质干细胞具有多向分化、因子分泌、免疫调控和促血管修复等多项优势,使其可以用于多种疾病的治疗。脐带在以往的妊娠过程中,在大多数时间被当做医疗废弃物销毁,采集脐带不会带来对母婴的损害。如果您没有利用自己脐带的计划,可以通过自愿捐献脐带来参与这项研究。如果您选择为本次研究捐献脐带,这些脐带将会从产科转移到实验室,之后它们将用于干细胞制备。

### 捐赠的意义

结合目前生物科学技术的发展,可以从脐带华通胶中分离间充质干细胞。人脐带间充质干细胞可以分化为各种不同类型的细胞,如心肌细胞、神经细胞或肝细胞等细胞。这些细胞对研究人体早期发育具有极大价值。脐带间充质干细胞还可以分泌多种细胞因子,从而对 GVHD、红斑狼疮和肺损伤等多种疾病的治疗也

有潜在价值。或在未来用于治疗由于特定细胞病变而对身体产生影响的疾病，如帕金森症、心脏病、糖尿病和脊髓损伤等。如果您同意捐赠,那么您捐赠的脐带将有可能被成功分离出人脐带间充质干细胞。有可能为国家的医疗事业做出贡献。

### **捐赠的风险**

如果您决定为本项目捐献脐带，您捐献的脐带将会用于其他患者的治疗。此外，您还需要了解并考虑心理上的风险，有些脐带捐献者会有焦虑或后悔的感觉。如果您对上述问题有任何疑问或担忧，请向协助您完成本知情同意书的人提出。

自愿捐献的脐带是妊娠后多余组织，对产妇和婴儿来说没有任何风险。

### **脐带的使用**

由于人脐带间充质干细胞分选培养的条件非常苛刻，所以有可能从您的脐带中能成功培养出人间充质干细胞，也有可能分离培养失败。这种细胞可以在细胞培养基中生长很多年，也可能被冷冻并用于今后的研究。我们将用这些细胞进行细胞治疗的研究，如果将来科学家发现了用干细胞治疗病人的方法，您无权限制或指定用您捐献的脐带所产生的干细胞进行治疗的对象。

您捐赠的脐带所产生的间充质干细胞绝对不会产生一个完整的个体。

### **潜在利益**

您需要知晓,在现有相关法律规定之下，您不会具有基于干细胞研究之上产生的包括但不限于细胞技术及知识产权相关的权益。本次研究最终会帮助医疗研究人员了解和治疗人类疾病，为您进行护理的医护人员均不会从本次研究中获得任何利益。

### **捐赠成本**

您参加此项研究没有任何成本。

### **信息保密**

此项研究中关于您参与的信息将在法律允许范围内被保密。您的个人信息、您所捐赠的脐带及由它产生的间充质干细胞和任何其他相关信息都会被妥善保

存。只有获得授权的研究团队成员才能获取。如果采用您的脐带获得细胞用于治疗目的，相关机构或委员会将会回顾研究记录，但是这些人一定遵守严格的保密原则。如法律要求公布您的隐私信息时，您将被告知。

### 同意及签署

在妊娠过程中，经过收集并无菌处理的脐带，我们夫妇对脐带的处理意见如下：

- 用于临床医疗、教学及科学研究。如分离间充质干细胞等医学研究；
- 经医学方法处理后丢弃；

若同意以上处理方式请在□内以 √ 标示，否则以 × 标示。

我们就关心的问题与医生进行了讨论。并得到了满意的答复，生殖医学中心有权根据我们上述意见处理脐带。我们是在完全知情的情况下签署知情同意书，同意以上所捐脐带用于临床医疗、教学及科学研究。

备注:\_\_\_\_\_.

女方:\_\_\_\_\_日期\_\_\_\_\_年\_\_\_\_月\_\_\_\_日

男方:\_\_\_\_\_日期\_\_\_\_\_年\_\_\_\_月\_\_\_\_日

医生:\_\_\_\_\_日期\_\_\_\_\_年\_\_\_\_月\_\_\_\_日
